# Supplementary material
Source: Springer Nature journal article supplement (https://www.springermedizin.de/resource/supplementary/12885_2006_590_MOESM3_ESM.pdf/9469838)

## Cyclin D1a – U266

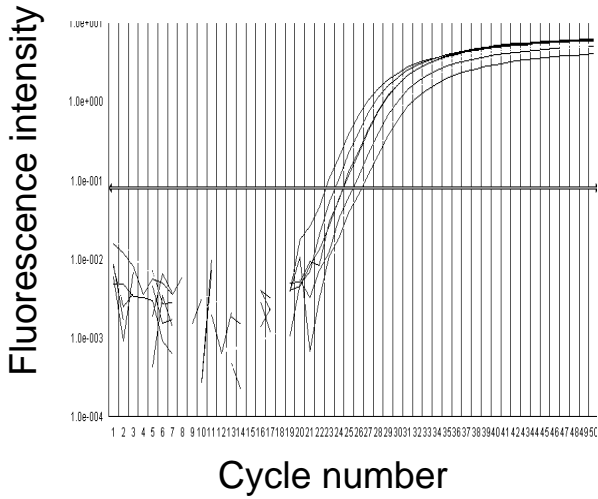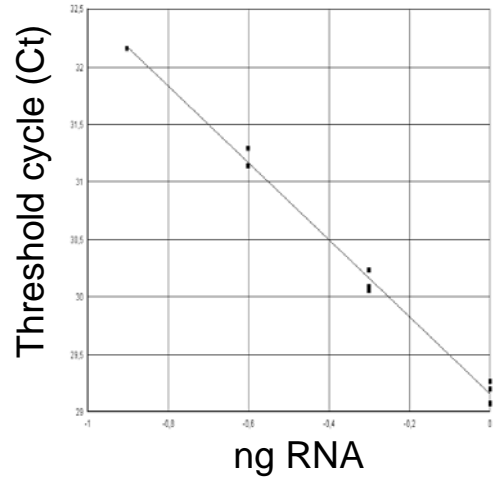

## Cyclin D1b – U266

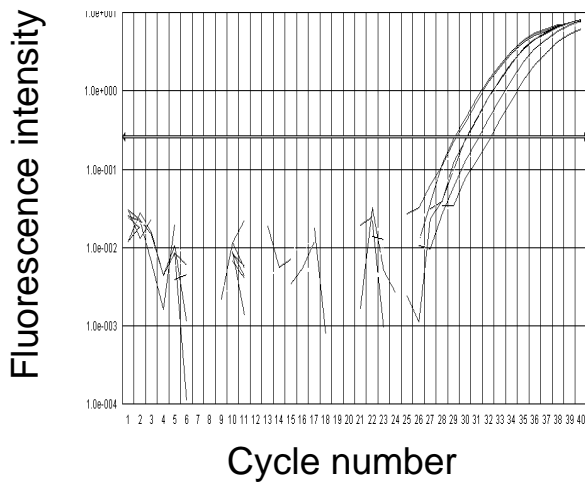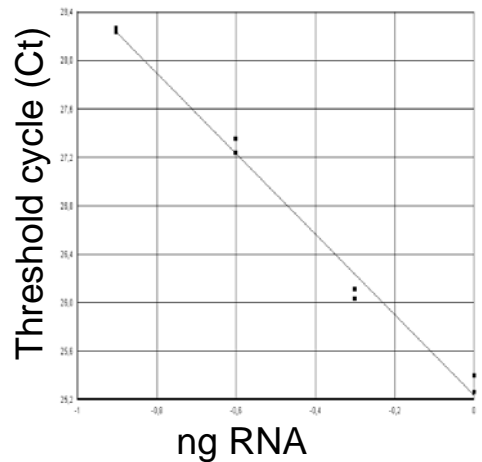

Supplement: MOESM3 [file 9469838]
